# Supplementary material for: Enhancement of Peroxydisulfate Activation for Complete Degradation of Refractory Tetracycline by 3D Self-Supported MoS2/MXene Nanocomplex
Source: MDPI journal article supplement (doi:10.3390/nano14090786), 2024-04-30

---

*Supplementary Materials for*

*Enhancement of Peroxydisulfate Activation for Complete  
Degradation of Refractory Tetracycline by 3D  
Self-Supported MoS<sub>2</sub>/MXene Nanocomplex*

Yuxia Song, Runhua Chen \*, Shihai Li, Shali Yu, Xiaoli Ni, Minglong Fang  
and Hanyun Xie

College of Life and Environmental Sciences, Central South University of  
Forestry and Technology, Changsha 410004, China

Correspondence: chen12@csuft.edu.cn

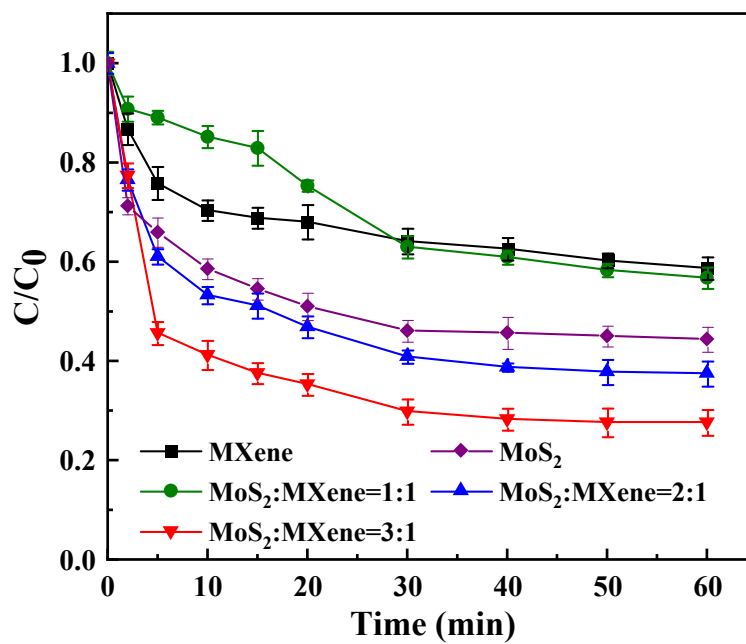

**Figure S1.** Effect of different materials on the degradation efficiency of TC.

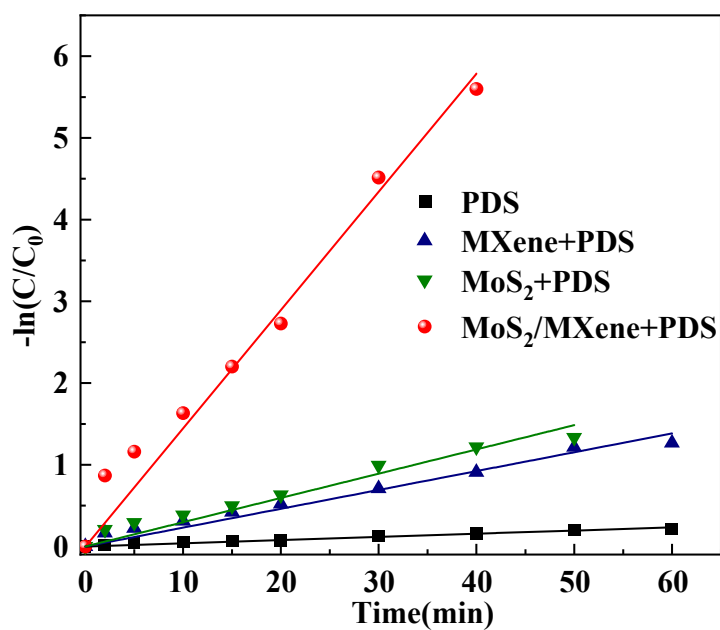

**Figure S2.** Kinetic fitting models for different materials/systems.

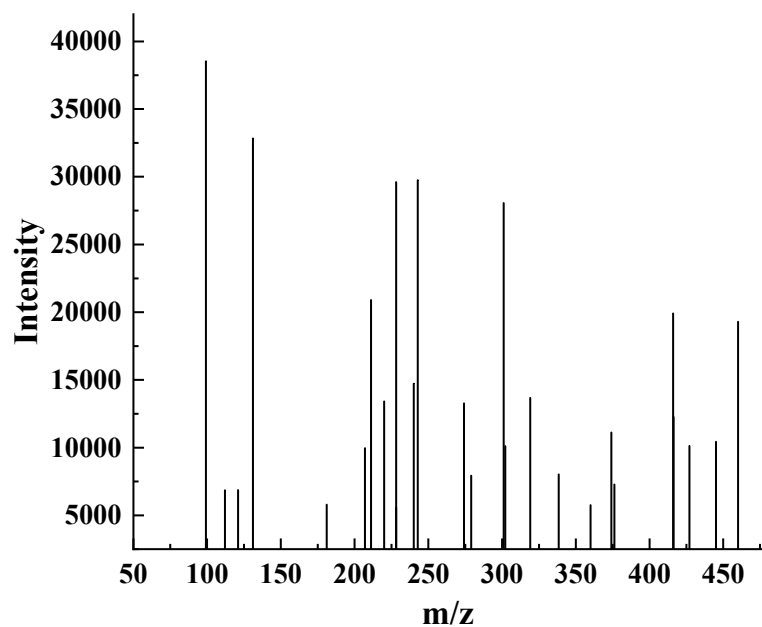

**Figure S3.** MS full scan spectra of intermediates in TC degradation in the MoS<sub>2</sub>/MXene/PDS system by LC-MS.

**Table S1.** The elemental weight percentages and atomic percentages of MoS<sub>2</sub>/MXene were calculated by EDX spectroscopy.

| Element | Weight % | Atomic % |
|---------|----------|----------|
| C       | 8.42     | 26.14    |
| O       | 5.68     | 13.23    |
| Mo      | 47.79    | 18.58    |
| S       | 32.18    | 37.43    |
| Ti      | 5.94     | 4.62     |

**Table S2.** The fitting parameters of kinetic models of TC degradation by MoS<sub>2</sub>/MXene/PDS.

| Materials/Systems           | Equations   | $k(\text{min}^{-1})$ | $R^2$ |
|-----------------------------|-------------|----------------------|-------|
| PDS                         | $y=0.0039x$ | 0.0039               | 0.992 |
| MXene/PDS                   | $y=0.0231x$ | 0.0231               | 0.988 |
| MoS <sub>2</sub> /PDS       | $y=0.0297x$ | 0.0297               | 0.983 |
| MoS <sub>2</sub> /MXene/PDS | $y=0.1447x$ | 0.1447               | 0.991 |

**Table S3.** The reaction rate constants of radicals with the corresponding scavenger.

| Free Radical Species                      | Scavenger          | Rate Constant ( $k$ ) ( $\text{M}^{-1} \text{s}^{-1}$ )       |
|-------------------------------------------|--------------------|---------------------------------------------------------------|
| $\text{SO}_4^{\bullet-}/\bullet\text{OH}$ | Ethanol (EtOH)     | $(1.6\text{-}7.7) \times 10^7 / (1.2\text{-}2.8) \times 10^9$ |
|                                           | Methanol (MeOH)    | $(1.6\text{-}7.7) \times 10^7 / 9.7 \times 10^8$              |
|                                           | Tert-butanol (TBA) | $(4.0\text{-}9.1) \times 10^5 / (3.8\text{-}7.6) \times 10^8$ |
| $\text{O}_2^{\bullet-}$                   | Benzoquinone(p-BQ) | $3.0 \times 10^{10}$                                          |

**Table S4.** The Elemental peak positions and contents of fresh and used MoS<sub>2</sub>/MXene

| Elements | Fresh          |              | Used           |              |
|----------|----------------|--------------|----------------|--------------|
|          | Peak Positions | Contents (%) | Peak Positions | Contents (%) |
| C 1s     | 285.1eV        | 66.62        | 284.8 eV       | 56.32        |
| O 1s     | 532.2 eV       | 15.77        | 530.9 eV       | 23.20        |
| Mo 3d    | 228.4 eV       | 5.31         | 228.4 eV       | 6.85         |
| S 2p     | 161.8 eV       | 9.29         | 161.9 eV       | 9.13         |
| Ti 2p    | 456.1 eV       | 3.01         | 458.7 eV       | 4.49         |

**Table S5.** The group percentages of fresh and used MoS<sub>2</sub>/MXene.

| Samples | C (%) |       |      | O (%) |      |      | Mo (%)           |                  | S (%)           |                              |
|---------|-------|-------|------|-------|------|------|------------------|------------------|-----------------|------------------------------|
|         | C-C   | C-O   | Ti-C | C-O   | Ti-O | C=O  | Mo <sup>4+</sup> | Mo <sup>6+</sup> | S <sup>2-</sup> | S <sub>2</sub> <sup>2-</sup> |
| Fresh   | 32.57 | 5.45  | 1.59 | 16.52 | 5.61 | 5.93 | 5.93             | 0.07             | 15.37           | 0                            |
| Used    | 41.41 | 11.21 | 0    | 9.88  | 8.57 | 3.99 | 4.54             | 0.86             | 12.63           | 0.67                         |

**Table S6.** Liquid-phase mass spectrometry (LC-MS) analysis of intermediates and possible structural formulae.

| Number | m/z | Supposed Structure                                                                   |
|--------|-----|--------------------------------------------------------------------------------------|
| TC     | 446 | 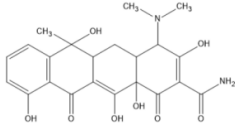   |
| P11    | 460 |  |
| P12    | 374 |  |
| P13    | 302 |  |
| P14    | 242 |  |
| P15    | 240 |  |
| P16    | 220 |  |

---

P17 228

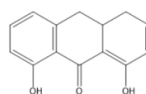

P18 99

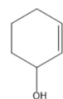

P21 416

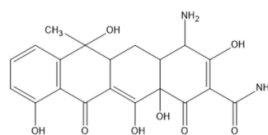

P22 376

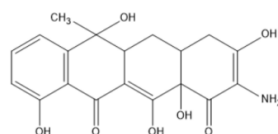

P23 338

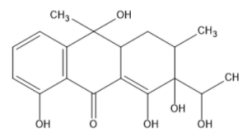

P24 360

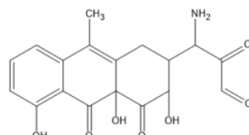

P25 211

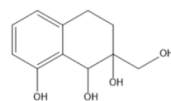

P26 121

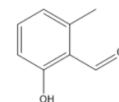

P31 427

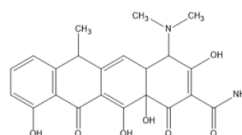

P32 319

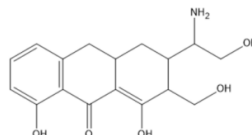

P33 279

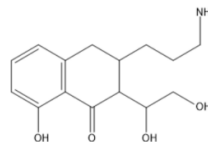

P34 207

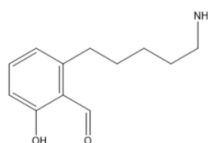

---

P35 181

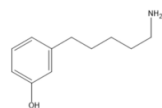

P36 301

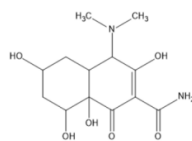

P37 274

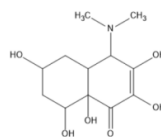

P38 131

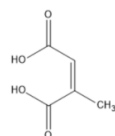

P39 112

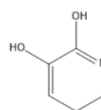

Supplement: s1 [file s1]
